# Supplementary material for: Aberrant Signaling Pathways in Sinonasal Intestinal-Type Adenocarcinoma
Source: MDPI journal article supplement (doi:10.3390/cancers13195022), 2021-10-07
Supplement: s1 [file s1]

**Table S1.** Somatic and loss of heterozygosity (LOH) variants found in the 29 tumor/germline matched cases.

| Case | Subtype   | Gene   | c.Hgvs                            | p.Hgvs            | Variant Classification | Blood AF | Tumor AF |
|------|-----------|--------|-----------------------------------|-------------------|------------------------|----------|----------|
| 1    | Colonic   | ERBB3  | c.217G>A                          | p.Asp73Asn        | Missense               | 0        | 0.32     |
|      |           | LRP1B  | c.2152C>A =                       | p.His718Asn       | Missense               | 0        | 0.29     |
|      |           | LRP1B  | c.10844G>C                        | p.Gly3615Ala      | Missense (LOH)         | 0.37     | 0.78     |
| 3    | Solid     | ATM    | c.1744T>C                         | p.Phe582Leu       | Missense (LOH)         | 0.44     | 0.95     |
|      |           | BRCA2  | c.9976A>T                         | p.Lys3326*        | Nonsense (LOH)         | 0.51     | 0.89     |
| 4    | Mucinous  | DNMT3A | c.1895A>G =                       | p.His632Arg       | Missense               | 0        | 0.19     |
| 6    | Colonic   | KRAS   | c.38G>A                           | p.Gly13Asp        | Missense               | 0        | 0.53     |
|      |           | APC    | c.5826_5829delCAGA                | p.Asp1942Glufs*27 | Frameshift Deletion    | 0        | 0.38     |
|      |           | ATM    | c.3161C>G                         | p.Pro1054Arg      | Missense (LOH)         | 0.41     | 0.82     |
| 7    | Colonic   | KRAS   | c.35G>A                           | p.Gly12Asp        | Missense               | 0        | 0.43     |
|      |           | CDKN2A | c.172C>T                          | p.Arg58*          | Nonsense               | 0        | 0.81     |
|      |           | FOXA1  | c.442C>G                          | p.Leu148Val       | Missense (LOH)         | 0.50     | 0.85     |
| 8    | Colonic   | BRAF   | c.1780G>A                         | p.Asp594Asn       | Missense               | 0        | 0.31     |
|      |           | PIK3CA | c.1637A>G                         | p.Gln546Arg       | Missense               | 0        | 0.29     |
|      |           | CTNNB1 | c.1004A>T                         | p.Lys335Ile       | Missense               | 0        | 0.59     |
| 10   | Mucinous  | NOTCH2 | c.4733G>A                         | p.Arg1578His      | Missense               | 0        | 0.27     |
|      |           | PDGFRA | c.1364A>G                         | p.Lys455Arg       | Missense               | 0        | 0.28     |
|      |           | KIT    | c.1039C>A =                       | p.Gln347Lys       | Missense               | 0        | 0.23     |
|      |           | PIK3CA | c.331A>G                          | p.Lys111Glu       | Missense               | 0        | 0.25     |
|      |           | PIK3CA | c.1361A>G                         | p.Asp454Gly       | Missense               | 0        | 0.26     |
|      |           | ATM    | c.497-2A>T =                      |                   | Intronic Splicing      | 0        | 0.28     |
|      |           | KMT2A  | c.472dupA =                       | p.Arg158Lysfs*12  | Frameshift Insertion   | 0        | 0.25     |
|      |           | KMT2A  | c.7255G>T =                       | p.Glu2419*        | Nonsense               | 0        | 0.26     |
|      |           | ESR1   | c.1057G>T =                       | p.Glu353*         | Nonsense               | 0        | 0.19     |
|      |           | PIK3R2 | c.1010+3A>T =                     |                   | Intronic Splicing      | 0        | 0.24     |
| 11   | Papillary | ERBB4  | c.2008A>G                         | p.Thr670Ala       | Missense               | 0        | 0.28     |
|      |           | PIK3CA | c.3140A>G                         | p.His1047Arg      | Missense               | 0        | 0.30     |
|      |           | SMO    | c.2285G>A                         | p.Arg762His       | Missense               | 0        | 0.29     |
|      |           | CDKN1B | c.376G>T =                        | p.Glu126*         | Nonsense               | 0        | 0.29     |
|      |           | KRAS   | c.35G>A                           | p.Gly12Asp        | Missense               | 0        | 0.27     |
| 12   | Colonic   | ROS1   | c.6116G>A                         | p.Arg2039His      | Missense               | 0        | 0.22     |
|      |           | NF1    | c.6709C>T                         | p.Arg2237*        | Nonsense               | 0        | 0.71     |
|      |           | BRCA1  | c.4039A>G                         | p.Arg1347Gly      | Missense (LOH)         | 0.53     | 0.86     |
|      |           | NOTCH3 | c.3399C>A                         | p.His1133Gln      | Missense (LOH)         | 0.44     | 0.86     |
|      |           | JAK3   | c.2164G>A                         | p.Val722Ile       | Missense (LOH)         | 0.50     | 0.86     |
| 13   | Colonic   | ERBB2  | c.929C>T                          | p.Ser310Phe       | Missense               | 0        | 0.10     |
| 15   | Mucinous  | NOTCH2 | c.4888C>T                         | p.Arg1630Cys      | Missense               | 0        | 0.12     |
| 16   | Colonic   | FOXL2  | c.695C>T                          | p.Ala232Val       | Missense               | 0        | 0.30     |
|      |           | APC    | c.4585C>T                         | p.Gln1529*        | Nonsense               | 0        | 0.40     |
|      |           | MAP2K1 | c.622G>C =                        | p.Asp208His       | Missense               | 0        | 0.29     |
|      |           | NF1    | c.7946C>G                         | p.Ser2649*        | Nonsense               | 0        | 0.42     |
| 17   | Mucinous  | PIK3CA | c.2176G>A                         | p.Glu726Lys       | Missense               | 0        | 0.26     |
|      |           | APC    | c.4618G>T                         | p.Glu1540*        | Nonsense               | 0        | 0.42     |
| 18   | Papillary | BRCA1  | c.4600G>A                         | p.Val1534Met      | Missense (LOH)         | 0.47     | 0.76     |
| 21   | Colonic   | MTOR   | c.6607G>A                         | p.Gly2203Ser      | Missense               | 0        | 0.23     |
|      |           | IDH1   | c.394C>T                          | p.Arg132Cys       | Missense               | 0        | 0.29     |
|      |           | ATM    | c.2051A>C =                       | p.Gln684Pro       | Missense               | 0        | 0.43     |
|      |           | NF1    | c.7267dupA                        | p.Thr2423Asnfs*4  | Frameshift Insertion   | 0        | 0.36     |
| 22   | Colonic   | BRCA1  | c.4807_4823delGACTCTGGGGCTCTGTC = | p.Pro1603Argfs*13 | Frameshift Deletion    | 0        | 0.56     |
|      |           | AR     | c.234_239delGCAGCA                | p.Gln79_Gln80del  | Inframe Deletion       | 0        | 0.11     |
|      |           | ERBB3  | c.3529C>A                         | p.Leu1177Ile      | Missense (LOH)         | 0.44     | 0.92     |
| 23   | Mucinous  | AR     | c.234_239delGCAGCA                | p.Gln79_Gln80del  | Inframe Deletion       | 0        | 0.13     |
|      |           | LRP1B  | c.1604T>C                         | p.Val535Ala       | Missense               | 0        | 0.21     |
| 24   | Mucinous  | CTNNB1 | c.133_135delTCT                   | p.Ser45del        | Inframe Deletion       | 0        | 0.51     |
|      |           | FOXP1  | c.1144C>A =                       | p.Pro382Thr       | Missense               | 0        | 0.30     |
|      |           | PIK3CA | c.2816A>G                         | p.Asp939Gly       | Missense               | 0        | 0.25     |
| 25   | Solid     | DDR2   | c.1323G>A                         | p.Met441Ile       | Missense (LOH)         | 0.46     | 0.76     |
| 26   | Colonic   | LRP1B  | c.4496C>A                         | p.Thr1499Lys      | Missense               | 0        | 0.17     |

|    |          |       |                    |                   |                     |   |      |
|----|----------|-------|--------------------|-------------------|---------------------|---|------|
|    |          | APC   | c.4282G>T          | p.Gly1428Termfs*1 | Nonsense            | 0 | 0.37 |
|    |          | AR    | c.234_239delGCAGCA | p.Gln79_Gln80del  | Inframe Deletion    | 0 | 0.12 |
| 28 | Colonic  | APC   | c.4393_4394delAG   | p.Ser1465Trpfs*3  | Frameshift Deletion | 0 | 0.31 |
|    |          | ERBB3 | c.1064C>G *        | p.Thr355Ser       | Missense            | 0 | 0.30 |
| 29 | Mucinous | EZH2  | c.2193C>T          | p.Tyr731Tyr       | Missense            | 0 | 0.25 |

Only splicing and coding non-silent mutations with a tumor allele frequency >0.1 were considered. AF: Allele Frequency; c.Hgvs: standard HGVS nomenclature to describe the alteration at the DNA level; p.Hgvs: standard HGVS nomenclature to describe the predicted consequence at the protein level; \*: Variants not described in any of the consulted ICGC, COSMIC and Varsome cancer databases (reviewed 19.05.2020).

**Table S2.** Predicted somatic variants in the 21 tumor-only cases.

| Case | Subtype  | Gene   | c.Hgvs                   | p.Hgvs           | Variant Classification | Tumor AF | FATHMM-MKL score | SIFT Score      |
|------|----------|--------|--------------------------|------------------|------------------------|----------|------------------|-----------------|
| 30   | Colonic  | EPHA2  | c.2319delC =             | p.Thr774Profs*37 | Frameshift Deletion    | 0.27     | ND               | ND              |
|      |          | ATM    | c.146C>G                 | p.Ser49Cys       | Missense               | 0.48     | 0.50 Damaging    | 0.002 Damaging  |
|      |          | LRP1B  | c.2005A>G                | p.Ile669Val      | Missense               | 0.51     | 0.4544 Neutral   | 1 Tolerated     |
| 31   | Colonic  | NOTCH1 | c.4028C>T                | p.Ala1343Val     | Missense               | 0.50     | 0.9836 Damaging  | 0.199 Tolerated |
|      |          | KRAS   | c.35G>A                  | p.Gly12Asp       | Missense               | 0.58     | 0.9787 Damaging  | 0.002 Damaging  |
|      |          | AR     | c.228_239delGCAGCAGCAGCA | p.Gln77_Gln80del | Inframe Deletion       | 0.17     | ND               | ND              |
| 33   | Colonic  | APC    | c.2413C>T                | p.Arg805*        | Nonsense               | 0.63     | 0.8264 Damaging  | ND              |
|      |          | KRAS   | c.176C>G                 | p.Ala59Gly       | Missense               | 0.16     | 0.993 Damaging   | 0.003 Damaging  |
| 34   | Colonic  | FOXP1  | c.1135G>A                | p.Ala379Thr      | Missense               | 0.49     | 0.7647 Damaging  | 0.089 Tolerated |
| 35   | Mucinous | NOTCH2 | c.7223T>A                | p.Leu2408His     | Missense               | 0.24     | 0.8534 Damaging  | 0.013 Damaging  |
|      |          | LRP1B  | c.12161A>C               | p.Glu4054Ala     | Missense               | 0.36     | 0.9664 Damaging  | 0.736 Tolerated |
|      |          | PDGFRA | c.39_44delTCTTCT *       | p.Leu14_Leu15del | Inframe Deletion       | 0.11     | ND               | ND              |
|      |          | AR     | c.303_308dupGCAGCA       | p.Gln79_Gln80dup | Inframe Duplication    | 0.10     | ND               | ND              |
| 36   | Mucinous | ATM    | c.998C>T                 | p.Ser333Phe      | Missense               | 0.46     | 0.8806 Damaging  | 0.008 Damaging  |
|      |          | NF1    | c.2686delG =             | p.Asp896Ilefs*6  | Frameshift Deletion    | 0.12     | ND               | ND              |
|      |          | AR     | c.303_308dupGCAGCA       | p.Gln79_Gln80dup | Inframe Duplication    | 0.10     | ND               | ND              |
| 37   | Solid    | BRCA1  | c.2521C>T                | p.Arg841Trp      | Missense               | 0.48     | 0.03177 Neutral  | 0.003 Damaging  |
|      |          | ROS1   | c.2411C>A                | p.Thr804Asn      | Missense               | 0.42     | 0.97 Damaging    | 0.013 Damaging  |
|      |          | AR     | c.1424C>T                | p.Ala475Val      | Missense               | 0.99     | 0.2074 Neutral   | 0.023 Damaging  |
| 38   | Colonic  | AKT1   | c.138C>A                 | p.Asp46Glu       | Missense               | 0.46     | 0.9444 Damaging  | 0.223 Tolerated |
|      |          | TSC2   | c.5383C>T                | p.Arg1795Cys     | Missense               | 0.44     | 0.7739 Damaging  | 0 Damaging      |
|      |          | BRCA1  | c.3331_3334delCAAG       | p.Gln1111Asnfs*5 | Frameshift Deletion    | 0.38     | ND               | ND              |
|      |          | CSF1R  | c.895G>A                 | p.Ala299Thr      | Missense               | 0.49     | 0.6279 Damaging  | 0.039 Damaging  |
|      |          | MET    | c.504G>T                 | p.Glu168Asp      | Missense               | 0.47     | 0.6196 Damaging  | 0.304 Tolerated |
|      |          | AR     | c.237_239delGCA          | p.Gln80del       | Inframe Deletion       | 0.12     | ND               | ND              |
| 39   | Solid    | SMO    | c.808G>A                 | p.Val270Ile      | Missense               | 0.48     | 0.9063 Damaging  | 1 Tolerated     |
|      |          | PTCH1  | c.3487G>A                | p.Gly1163Ser     | Missense               | 0.46     | 0.9875 Damaging  | 0.065 Tolerated |
| 40   | Colonic  | ATM    | c.2932T>C                | p.Ser978Pro      | Missense               | 0.50     | 0.9876 Damaging  | 0 Damaging      |
|      |          | JAK3   | c.2152G>C                | p.Val718Leu      | Missense               | 0.47     | 0.7959 Damaging  | 0.035 Damaging  |
| 41   | Colonic  | FLT3   | c.1774G>A                | p.Val592Ile      | Missense               | 0.15     | 0.2952 Neutral   | 1 Tolerated     |
|      |          | ERBB2  | c.1960A>G                | p.Ile654Val      | Missense               | 0.71     | 0.9359 Damaging  | 0.161 Tolerated |
|      |          | BRCA1  | c.4039A>G                | p.Arg1347Gly     | Missense               | 0.26     | 0.6499 Damaging  | 0.179 Tolerated |
|      |          | APC    | c.1779G>A                | p.Trp593*        | Nonsense               | 0.39     | 0.9912 Damaging  | ND              |
|      |          | JAK3   | c.2164G>A                | p.Val722Ile      | Missense               | 0.46     | 0.2303 Neutral   | 0.029 Damaging  |
| 42   | Colonic  | LRP1B  | c.13114A>T               | p.Asn4372Tyr     | Missense               | 0.48     | 0.9433 Damaging  | 0.008 Damaging  |
|      |          | LRP1B  | c.11227G>A               | p.Gly3743Ser     | Missense               | 0.51     | 0.9899 Damaging  | 0.1 Tolerated   |
|      |          | AR     | c.237_239delGCA          | p.Gln80del       | Inframe Deletion       | 0.12     | ND               | ND              |
| 43   | Colonic  | KRAS   | c.35G>A                  | p.Gly12Asp       | Missense               | 0.28     | 0.9787 Damaging  | 0.002 Damaging  |
|      |          | EPHA2  | c.2162G>A                | p.Arg721Gln      | Missense               | 0.47     | 0.9092 Damaging  | 0.12 Tolerated  |

|    |           |        |                 |                  |                        |      |                 |                 |
|----|-----------|--------|-----------------|------------------|------------------------|------|-----------------|-----------------|
|    |           | TSC2   | c.5378G>A       | p.Arg1793Gln     | Missense               | 0.51 | 0.9696 Damaging | 0.008 Damaging  |
|    |           | AR     | c.237_239delGCA | p.Gln80del       | Inframe Deletion       | 0.13 | ND              | ND              |
| 44 | Colonic   | TSC2   | c.5116C>T       | p.Arg1706Cys     | Missense               | 0.53 | 0.7786 Damaging | 0.023 Damaging  |
|    |           | APC    | c.1746dupA *    | p.Ser583Ilefs*19 | Frameshift Duplication | 0.58 | ND              | ND              |
| 45 | Colonic   | ATM    | c.1810C>T       | p.Pro604Ser      | Missense               | 0.48 | 0.9573 Damaging | 0.107 Tolerated |
|    |           | ATM    | c.4388T>G       | p.Phe1463Cys     | Missense               | 0.48 | 0.9658 Damaging | 0.001 Damaging  |
|    |           | NTRK1  | c.16C>T         | p.Arg6Trp        | Missense               | 0.66 | 0.7065 Damaging | 0.006 Damaging  |
|    |           | LRP1B  | c.12003G>T      | p.Trp4001Cys     | Missense               | 0.29 | 0.9847 Damaging | 0.006 Damaging  |
| 46 | Papillary | KMT2A  | c.10648G>A      | p.Gly3550Arg     | Missense               | 0.48 | 0.8588 Damaging | 0.002 Damaging  |
|    |           | ERBB2  | c.1157C>A       | p.Ala386Asp      | Missense               | 0.98 | 0.1996 Neutral  | 0.162 Tolerated |
|    |           | ERBB2  | c.2033G>A       | p.Arg678Gln      | Missense               | 0.98 | 0.9412 Damaging | 0.099 Tolerated |
|    |           | NTRK1  | c.2339G>A       | p.Arg780Gln      | Missense               | 0.50 | 0.2051 Neutral  | 0.231 Tolerated |
|    |           | NOTCH3 | c.6532C>T       | p.Pro2178Ser     | Missense               | 0.49 | 0.1974 Neutral  | 0.569 Tolerated |
| 47 | Colonic   | TSC2   | c.5383C>T       | p.Arg1795Cys     | Missense               | 0.51 | 0.7739 Damaging | 0 Damaging      |
|    |           | BRCA1  | c.1367T>C       | p.Ile456Thr      | Missense               | 0.49 | 0.7227 Damaging | 0.033 Damaging  |
| 48 | Solid     | IL7R   | c.760G>A        | p.Ala254Thr      | Missense               | 0.48 | 0.02848 Neutral | 0.169 Tolerated |
|    |           | MTOR   | c.985G>A        | p.Ala329Thr      | Missense               | 0.46 | 0.9921 Damaging | 0.48 Tolerated  |
| 49 | Solid     | BRCA2  | c.430G>T        | p.Val144Phe      | Missense               | 0.24 | 0.2751 Neutral  | 0.008 Damaging  |
|    |           | BRCA2  | c.5299A>T *     | p.Lys1767*       | Nonsense               | 0.41 | 0.2051 Neutral  | ND              |
|    |           | EPHA2  | c.334G>A        | p.Ala112Thr      | Missense               | 0.52 | 0.7379 Damaging | 0.425 Tolerated |

Only splicing and coding non-silent mutations with a tumor allele frequency >0.1 that appear in at least one of the consulted ICGC, COSMIC and Varsomec cancer databases or have a known protein effect were considered. AF: Allele Frequency; c.Hgvs: standard HGVS nomenclature to describe the alteration predicted consequence at the DNA level; p.Hgvs: standard HGVS nomenclature to describe the alteration predicted consequence at the protein level; FATHMM: Functional Analysis through Hidden Markov Models, an in-silico tool that predicts the effects of protein missense mutations; MKL: in addition to FATHMM predicts noncoding effects by integrating functional annotation information from the ENCODE, range 0 to 1; SIFT: sorts intolerant from tolerant, an in-silico prediction tool for nonsynonymous variants based on sequence homology derived from closely related sequences, range 0 to 1 with values less than 0.05 usually considered intolerant. \*: Variants not described in any of the consulted ICGC, COSMIC and Varsome cancer databases (rev.19.05.2020).

**Table S3.** Copy number gains in the 29 tumor/germline matched cases.

| Case | Subtype   | Chromosome | Start     | End       | Gene   | Copy Number | Variant Type | Affected Region |
|------|-----------|------------|-----------|-----------|--------|-------------|--------------|-----------------|
| 3    | Solid     | 11         | 69641292  | 69651343  | CCND1  | 4           | Gain         | Whole Gene      |
|      |           | 11         | 108227564 | 108365572 | ATM    | 8           | Gain         | Whole Gene      |
|      |           | 7          | 116695693 | 116796137 | MET    | 20          | Gain         | Whole Gene      |
|      |           | 8          | 38413559  | 38461172  | FGFR1  | 4           | Gain         | Whole Gene      |
| 4    | Mucinous  | 8          | 38413559  | 38461172  | FGFR1  | 4           | Gain         | Whole Gene      |
| 10   | Mucinous  | 4          | 1793861   | 1807700   | FGFR3  | 4           | Gain         | Whole Gene      |
| 12   | Colonic   | 1          | 114708474 | 114716224 | NRAS   | 10          | Gain         | Whole Gene      |
|      |           | 13         | 28003992  | 28100572  | FLT3   | 5           | Gain         | Whole Gene      |
|      |           | 8          | 38413559  | 38461172  | FGFR1  | 4           | Gain         | Whole Gene      |
| 17   | Mucinous  | 6          | 36677776  | 36685859  | CDKN1A | 4           | Gain         | Whole Gene      |
|      |           | 6          | 117288478 | 117425714 | ROS1   | 4           | Gain         | Whole Gene      |
|      |           | 6          | 151807898 | 152098980 | ESR1   | 4           | Gain         | Whole Gene      |
| 18   | Papillary | 17         | 39699501  | 39728058  | ERBB2  | 5           | Gain         | Whole Gene      |
|      |           | 17         | 43045607  | 43124164  | BRCA1  | 5           | Gain         | Whole Gene      |
| 20   | Colonic   | 11         | 69641292  | 69651343  | CCND1  | 4           | Gain         | Whole Gene      |
|      |           | 3          | 38138640  | 38141352  | MYD88  | 4           | Gain         | Whole Gene      |
|      |           | 3          | 41224002  | 41239357  | CTNNB1 | 6           | Gain         | Whole Gene      |
| 21   | Colonic   | 15         | 90084201  | 90102452  | IDH2   | 4           | Gain         | Whole Gene      |
|      |           | 15         | 98649520  | 98957455  | IGF1R  | 4           | Gain         | Whole Gene      |
| 22   | Colonic   | 1          | 11106537  | 11259472  | MTOR   | 4           | Gain         | Whole Gene      |
|      |           | 7          | 81702512  | 81770035  | HGF    | 4           | Gain         | Whole Gene      |
|      |           | 7          | 92615080  | 92833338  | CDK6   | 4           | Gain         | Whole Gene      |
|      |           | 7          | 116695693 | 116796137 | MET    | 4           | Gain         | Whole Gene      |
|      |           | 7          | 129189136 | 129212465 | SMO    | 4           | Gain         | Whole Gene      |
|      |           | 7          | 140734514 | 140924766 | BRAF   | 4           | Gain         | Whole Gene      |
|      |           | 7          | 148807518 | 148847359 | EZH2   | 4           | Gain         | Whole Gene      |
| 24   | Mucinous  | 3          | 41224002  | 41239357  | CTNNB1 | 4           | Gain         | Whole Gene      |
| 25   | Solid     | 1          | 156815761 | 156881705 | NTRK1  | 4           | Gain         | Whole Gene      |
|      |           | 1          | 162718996 | 162780310 | DDR2   | 4           | Gain         | Whole Gene      |
|      |           | 1          | 206768573 | 206772496 | IL10   | 4           | Gain         | Whole Gene      |
|      |           | 1          | 243499680 | 243843231 | AKT3   | 4           | Gain         | Whole Gene      |
|      |           | 7          | 81702512  | 81770035  | HGF    | 5           | Gain         | Whole Gene      |
|      |           | 7          | 92615080  | 92833338  | CDK6   | 6           | Gain         | Whole Gene      |

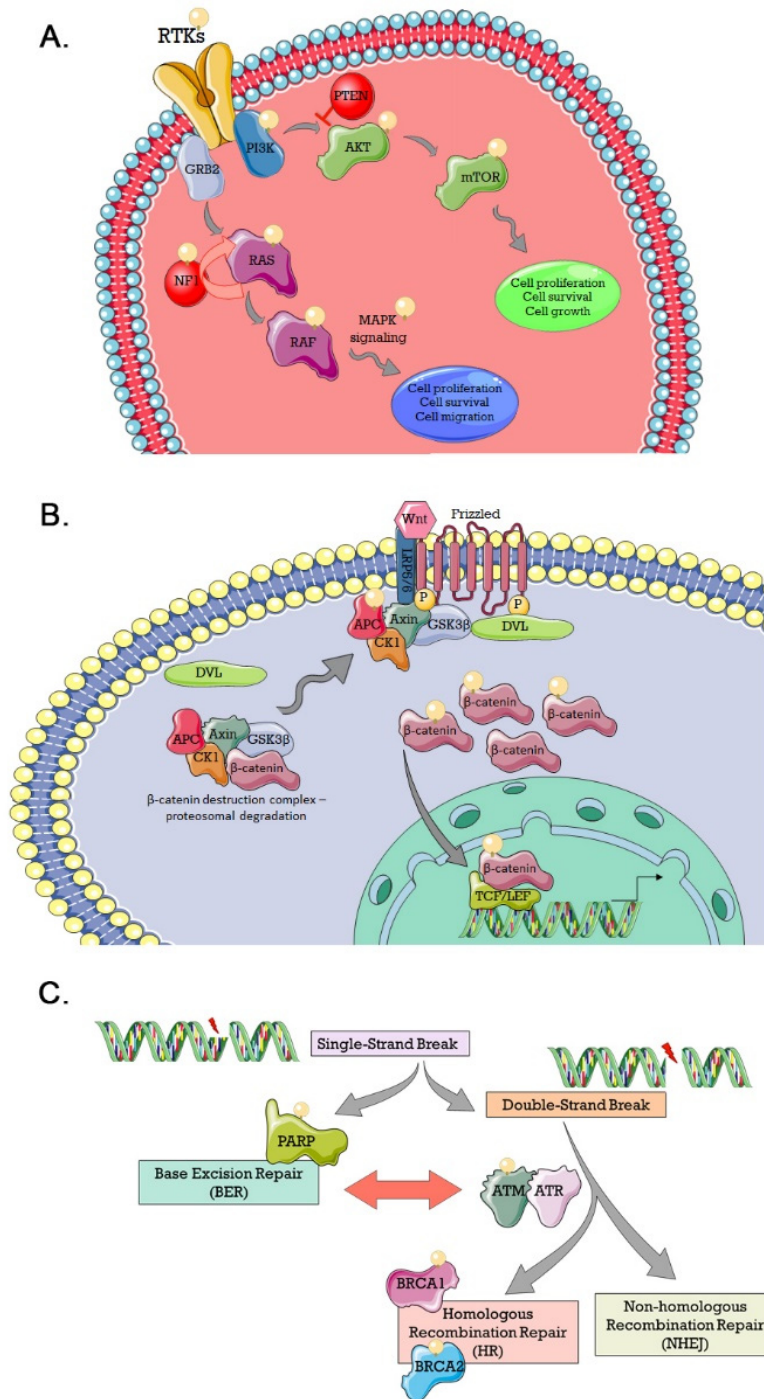

**Figure S1.** Maps of the signaling pathways discussed in this paper. (A) Combined MAPK and PI3K pathways that can be activated through various RTKs (main manuscript sections 3.4.3, 3.4.4 and 3.4.5); (B) Wnt pathway (main manuscript section 3.4.1); (C) DNA damage response pathway (main manuscript section 3.4.2). The genes/proteins marked by a yellow globe were found mutated in this study.
